# Supplementary material
Source: PubMed Central journal article supplement (PMC5076507)
Supplement: 10.1074_M116.743856_jbc.M116.743856-1.pdf [file 10.1074_M116.743856_jbc.M116.743856-1.pdf]

Structures of Exopolysaccharides Involved in Receptor-Mediated Perception of *Mesorhizobium loti* by *Lotus japonicus*

**Artur Muszyński<sup>1#</sup>, Christian Heiss<sup>1</sup>, Christian T. Hjuler<sup>3,5</sup>, John T. Sullivan<sup>2</sup>, Simon J. Kelly<sup>2,3,4</sup>, Mikkel B. Thygesen<sup>3,5</sup>, Jens Stougaard<sup>3,4</sup>, Parastoo Azadi<sup>1</sup>, Russell W. Carlson<sup>1</sup> and Clive W. Ronson<sup>2,3#</sup>**

From the <sup>1</sup>Complex Carbohydrate Research Center, University of Georgia, Athens GA, USA, the

<sup>2</sup>Department of Microbiology and Immunology, University of Otago, Dunedin, New Zealand, the

<sup>3</sup>Centre for Carbohydrate Recognition and Signaling, Aarhus University, Aarhus, Denmark, the

<sup>4</sup>Department of Molecular Biology and Genetics, Aarhus University, Aarhus C, Denmark, and the

<sup>5</sup>Department of Chemistry, University of Copenhagen, Copenhagen, Denmark

**Running title:** Structures of high and low molecular mass EPS of *Mesorhizobium loti* R7A

# To whom correspondence should be addressed: Dr. Artur Muszyński, Complex Carbohydrate Research Center, University of Georgia, 315 Riverbend Rd, Athens, Georgia 30602, USA; Telephone: +1 (706) 542-9496; FAX: +1 (706) 542-4412; E-mail: muszynski@ccrc.uga.edu; or Prof. Clive Ronson, Department of Microbiology and Immunology, University of Otago, 720 Cumberland St, Dunedin, New Zealand, Telephone: +64 3-479-7701 email: Clive.Ronson@otago.ac.nz

**Keywords:** *Mesorhizobium loti*, exopolysaccharide, acetylation, determinate symbiosis, octasaccharide, polysaccharide structure, rhizobia, riburonic acid

---

**SUPPLEMENTAL DATA**

## SUPPLEMENTAL TABLES

**Supplemental Table 1.** Comparison of observed chemical shifts of residue E and H in both HMM and LMM EPS with calculated values obtained from CASPER (1). Since RibfA was not available in the CASPER database, we omitted it from the structure that was used for the chemical shift calculation.

| EPS              | Residue                     | H1<br>C1 | H2<br>C2 | H3<br>C3 | H4<br>C4 | H5<br>C5  | H6a,b<br>C6 |
|------------------|-----------------------------|----------|----------|----------|----------|-----------|-------------|
| HMM              | E, 4,6- $\beta$ -Glc        | 4.50     | 3.30     | 3.68     | 3.72     | 3.76      | 4.23/3.90   |
|                  |                             | 103.3    | 73.6     | 75.3     | 78.9     | 74.2      | 68.9        |
|                  | 4,6- $\beta$ -Glc*          | 4.56     | 3.39     | 3.69     | 3.73     | 3.81      | 4.27/3.96   |
|                  |                             | 103.23   | 73.80    | 75.10    | 79.43    | 74.82     | 68.79       |
|                  | H, 3- $\beta$ -Gal          | 4.49     | 3.68     | 3.76     | 4.13     | 3.76      | n.d.        |
|                  |                             | 103.3    | 70.7     | 82.8     | 68.9     | 74.2      |             |
| 3- $\beta$ -Gal* | 4.51                        | 3.72     | 3.82     | 4.21     | 3.76     | 3.81/3.80 |             |
|                  | 103.49                      | 70.68    | 83.25    | 69.15    | 75.88    | 61.82     |             |
| LMM              | E, 6- $\beta$ -Glc          | 4.50     | 3.32     | 3.51     | 3.44     | 3.68      | 4.20/3.83   |
|                  |                             | 103.0    | 73.4     | 76.0     | 70.1     | 75.3      | 69.5        |
|                  | 6- $\beta$ -Glc*            | 4.53     | 3.34     | 3.53     | 3.49     | 3.67      | 4.20/3.88   |
|                  |                             | 103.41   | 74.08    | 76.54    | 70.43    | 75.96     | 69.37       |
|                  | H $\beta$ , 3- $\beta$ -Gal | 4.62     | 3.64     | 3.78     | 4.16     | 3.70      | n.d.        |
|                  |                             | 96.6     | 71.1     | 82.8     | 68.7     | 75.4      |             |
| 3- $\beta$ -Gal* | 4.58                        | 3.60     | 3.74     | 4.15     | 3.68     | 3.72/3.67 |             |
|                  | 97.05                       | 71.75    | 83.45    | 69.35    | 75.65    | 61.85     |             |

\*chemical shifts derived from CASPER database. The model structures presented below were used for chemical shift predictions.

HMM model structure

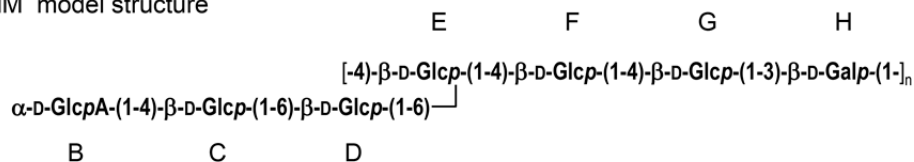

LMM model structure

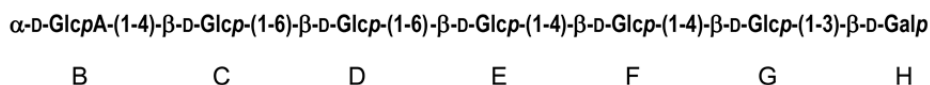

**Supplemental Table 2.** High resolution MS analysis of LMM EPS octasaccharide. For mass spectra and structure assignments refer to Supplemental Figure 4

| EPS octasaccharide      | Residues                                         | Composition                                                                                 | OAc groups                                                                | Calcd.    | Found      | $\Delta$ (ppm) |       |
|-------------------------|--------------------------------------------------|---------------------------------------------------------------------------------------------|---------------------------------------------------------------------------|-----------|------------|----------------|-------|
| HR-MS                   | A-H                                              | [RibAGlcAHex <sub>7</sub> OAc <sub>3</sub> +Na] <sup>+</sup>                                | 3                                                                         | 1629.4549 | 1629.4558  | -0.55          |       |
|                         | A-H                                              | [RibAGlcAHex <sub>6</sub> OAc <sub>4</sub> +Na] <sup>+</sup>                                | 4                                                                         | 1503.4126 | 1503.4142  | -1.06          |       |
|                         | A-H                                              | [RibAGlcAHex <sub>6</sub> OAc <sub>3</sub> +K] <sup>+</sup>                                 | 3                                                                         | 1477.3760 | 1477.3767  | -0.47          |       |
|                         | A-H                                              | [RibAGlcAHex <sub>6</sub> OAc <sub>3</sub> +Na] <sup>+</sup>                                | 3                                                                         | 1461.4020 | 1461.4027* | -0.47          |       |
|                         | A-H                                              | [RibAGlcAHex <sub>6</sub> OAc <sub>3</sub> +NH <sub>4</sub> ] <sup>+</sup>                  | 3                                                                         | 1456.4466 | 1456.4474  | -0.54          |       |
|                         | A-H                                              | [RibAGlcAHex <sub>6</sub> OAc <sub>3</sub> +NH <sub>4</sub> -H <sub>2</sub> O] <sup>+</sup> | 3                                                                         | 1438.4361 | 1438.4366  | -0.34          |       |
|                         | A-H                                              | [RibAGlcAHex <sub>6</sub> OAc <sub>2</sub> +K] <sup>+</sup>                                 | 2                                                                         | 1435.3654 | 1435.3661  | -0.49          |       |
|                         | A-H                                              | [RibAGlcAHex <sub>6</sub> OAc <sub>2</sub> +Na] <sup>+</sup>                                | 2                                                                         | 1419.3915 | 1419.3917  | -0.14          |       |
|                         | A-H                                              | [RibAGlcAHex <sub>6</sub> OAc <sub>2</sub> +NH <sub>4</sub> -H <sub>2</sub> O] <sup>+</sup> | 2                                                                         | 1396.4255 | 1396.4256  | -0.07          |       |
|                         | A-H                                              | [RibAGlcAHex <sub>6</sub> OAc+Na] <sup>+</sup>                                              | 1                                                                         | 1377.3809 | 1377.3816  | -0.50          |       |
|                         | A-H                                              | [RibAGlcAHex <sub>6</sub> OAc <sub>3</sub> +2Na] <sup>2+</sup>                              | 3                                                                         | 742.1956  | 742.1957   | -0.13          |       |
| Fragmentation ion       |                                                  |                                                                                             |                                                                           |           |            |                |       |
| No.                     | Type                                             |                                                                                             |                                                                           |           |            |                |       |
| I                       | Y <sub>7</sub>                                   | B-H                                                                                         | [GlcAHex <sub>6</sub> OAc <sub>2</sub> +Na] <sup>+</sup>                  | 2         | 1273.3699  | 1273.3701      | -0.15 |
| II                      | Y <sub>7</sub>                                   | B-H                                                                                         | [GlcAHex <sub>6</sub> OAc+Na] <sup>+</sup>                                | 1         | 1231.3594  | 1231.3599      | -0.40 |
| III                     | B <sub>6</sub>                                   | A-F                                                                                         | [RibAGlcAHex <sub>4</sub> OAc <sub>3</sub> +Na] <sup>+</sup>              | 3         | 1137.2964  | 1137.2964      | 0.00  |
| IV                      | Y <sub>7</sub> /B <sub>7</sub>                   | B-G                                                                                         | [GlcAHex <sub>5</sub> OAc <sub>2</sub> +Na] <sup>+</sup>                  | 2         | 1111.3171  | 1111.3172      | -0.08 |
| V                       | Y <sub>7</sub> /B <sub>7</sub>                   | B-G                                                                                         | [GlcAHex <sub>5</sub> OAc <sub>2</sub> +Na-H <sub>2</sub> O] <sup>+</sup> | 2         | 1093.3066  | 1093.3059      | 0.64  |
| VI                      | Y <sub>6</sub> /B <sub>7</sub>                   | C-G                                                                                         | [Hex <sub>5</sub> OAc <sub>2</sub> +Na] <sup>+</sup>                      | 2         | 935.2850   | 935.2848       | 0.21  |
| VII                     | Y <sub>3</sub> or Y <sub>4</sub> /B <sub>7</sub> | 3 Hex                                                                                       | [Hex <sub>3</sub> -OH] <sup>+</sup>                                       | 0         | 487.1657   | 487.1632       | 5.13  |
| MS/MS                   |                                                  |                                                                                             |                                                                           |           |            |                |       |
| *MS/MS of m/z 1461.4026 | A-H                                              | [RibAGlcAHex <sub>6</sub> OAc <sub>3</sub> +Na] <sup>+</sup>                                | 3                                                                         | 1461.4026 | 1461.4017  | 0.04           |       |
|                         | A-H                                              | [RibAGlcAHex <sub>6</sub> OAc <sub>3</sub> +Na-H <sub>2</sub> O] <sup>+</sup>               | 3                                                                         | 1443.3914 | 1443.3899  | -2.13          |       |
| Fragmentation ion       |                                                  |                                                                                             |                                                                           |           |            |                |       |
| No.                     | Type                                             |                                                                                             |                                                                           |           |            |                |       |
| VIII                    | B <sub>7</sub>                                   | A-G                                                                                         | [RibAGlcAHex <sub>5</sub> OAc <sub>3</sub> +Na] <sup>+</sup>              | 3         | 1299.3492  | 1299.3473      | -1.61 |
| IX                      | Y <sub>7</sub>                                   | B-H                                                                                         | [GlcAHex <sub>6</sub> OAc <sub>2</sub> +Na] <sup>+</sup>                  | 2         | 1273.3699  | 1273.3705      | -2.15 |
| X                       | Y <sub>7</sub>                                   | B-H                                                                                         | [GlcAHex <sub>6</sub> OAc <sub>2</sub> +Na-H <sub>2</sub> O] <sup>+</sup> | 2         | 1255.3594  | 1255.3592      | -1.89 |
| XI                      | Y <sub>7</sub> /B <sub>7</sub>                   | B-G                                                                                         | [GlcAHex <sub>5</sub> OAc <sub>2</sub> +Na] <sup>+</sup>                  | 2         | 1111.3171  | 1111.3169      | -0.52 |
| XII                     | Y <sub>7</sub> /B <sub>7</sub>                   | B-G                                                                                         | [GlcAHex <sub>5</sub> OAc <sub>2</sub> +Na-H <sub>2</sub> O] <sup>+</sup> | 2         | 1093.3066  | 1093.3056      | 0.42  |
| XIII                    | Y <sub>5</sub> or Y <sub>6</sub> /B <sub>7</sub> | 5 Hex                                                                                       | [Hex <sub>5</sub> OAc <sub>2</sub> +Na] <sup>+</sup>                      | 2         | 935.2850   | 935.2848       | -1.35 |
| XIV                     | Y <sub>7</sub> /B <sub>6</sub>                   | B-F                                                                                         | [GlcAHex <sub>4</sub> OAc <sub>2</sub> +Na-H <sub>2</sub> O] <sup>+</sup> | 2         | 931.2537   | 931.2536       | -0.01 |

\*This parent ion was MS/MS fragmented.

## REFERENCES

1. Lundborg, M., and Widmalm, G. (2011) Structural analysis of glycans by NMR chemical shift prediction. *Anal. Chem.* **83**, 1514-1517

## SUPPLEMENTAL FIGURES AND FIGURE LEGENDS

**Supplemental Figure 1.** The mass spectra for the PMAA derivatives from HMM EPS of 4-linked GlcAp (A), terminally linked GlcpA (B), terminally linked RibfA (C), and reducing end 3-linked Galp (D) after carboxyl group reduction.

**Supplemental Figure 2.** The  $^1\text{H}$  NMR spectrum of intact (*O*-acetylated) HMM EPS from *M. loti* R7A at 70°C. The inset demonstrates viscosity of EPS dissolved in water at RT.

**Supplemental Figure 3.** The COSY spectrum of de-*O*-acetylated HMM EPS from *M. loti* R7A. The glycosyl residues A-H are as indicated in Table 1. The enlarged region presents the H1/H2 couplings for the  $\beta$ -linked hexosyl residues. Legend: “Hex”, gluco or galactosyl residue

**Supplemental Figure 4.** SEC elution profile of LMM crude exopolysacchride recovered from *M. loti* R7A *ndvB* G/RDA culture media, and comparison with elution profile of a standard mixture of neutral hexose (G1), hexa-oligosacchrides (G3, G5, G7) and 40-kDa dextran (Vo). The main fraction recovered from culture precipitate was that of *O*-acetylated octasaccharide. A maximum Superdex Peptide 10/300GL column exclusion limit =7000 Da.

**Supplemental Figure 5.** XR ESI-FT-ICR-MS analysis of LMM EPS octasaccharide, with fragmentation ions indicated with roman numerals I-XIV as listed in Supplemental Table 2.) The panel shows an overview of the MS data obtained for EPS octasaccharide, with an expansion of the mass range  $m/z$  1350-1550 displayed in panel B. C) MS/MS for the ion 1461.4026, showing further fragmentation of the octasaccharide. D) Summary of proposed ICR-MS fragmentation

**Supplemental Figure 6.** Comparison and alignment of *exo* genes involved in biosynthesis of EPS in *M. loti* R7A, *S. meliloti* 1021, *S. fredii* NGR234, *R. tropici* CIAT899.

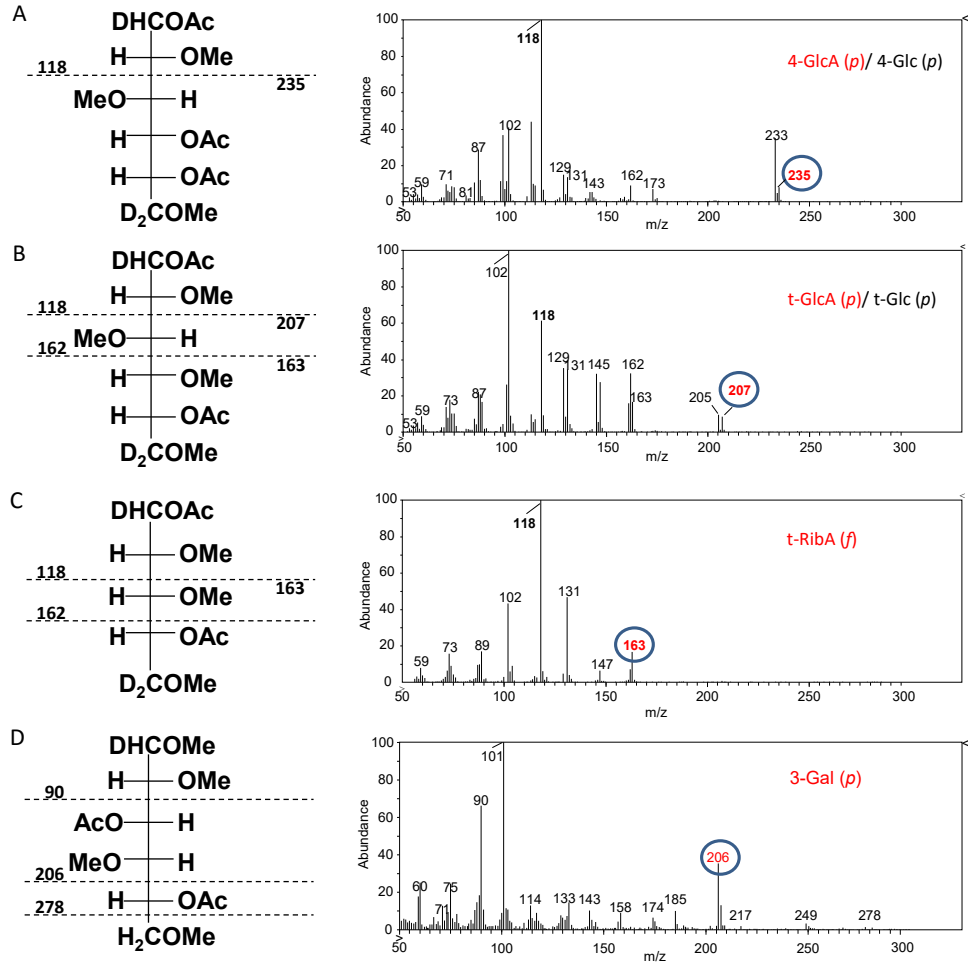

Supplemental Figure 1

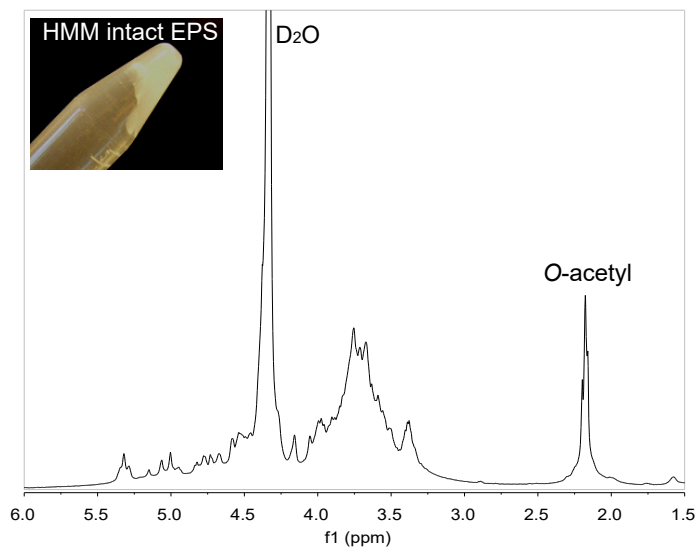

Supplemental Figure 2

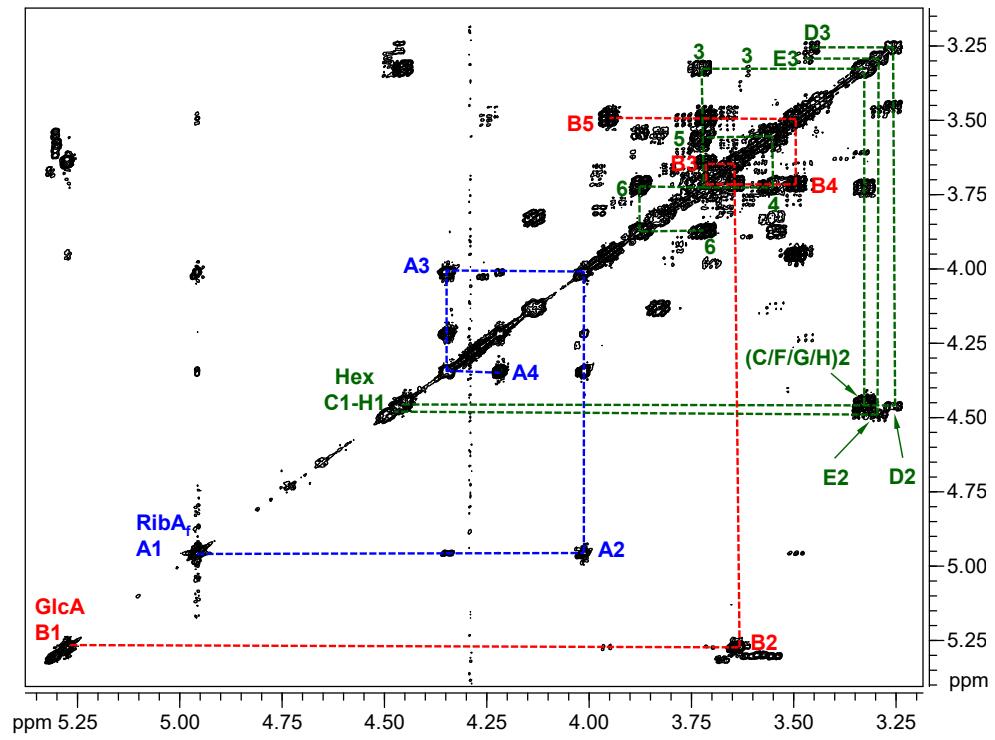

Supplemental Figure 3

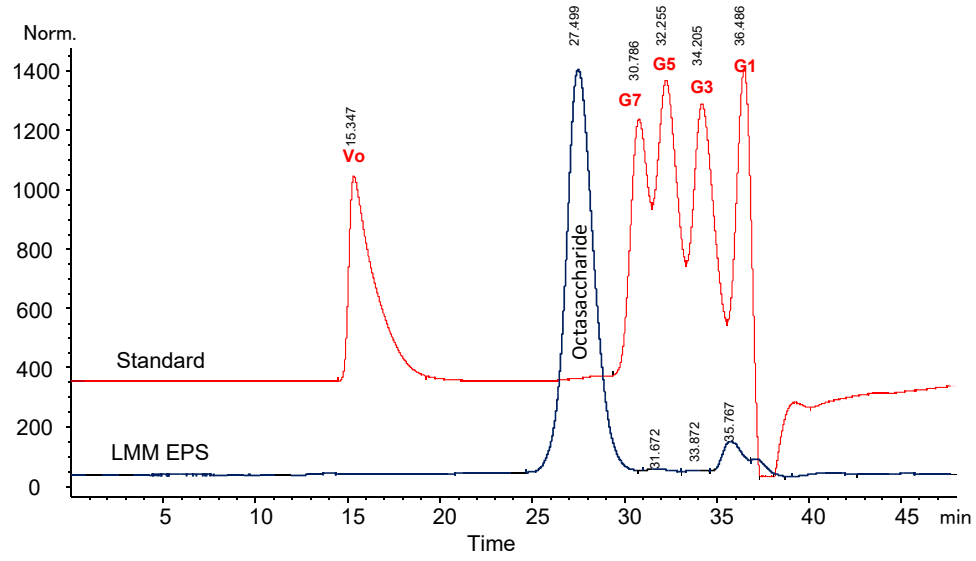

Supplemental Figure 4



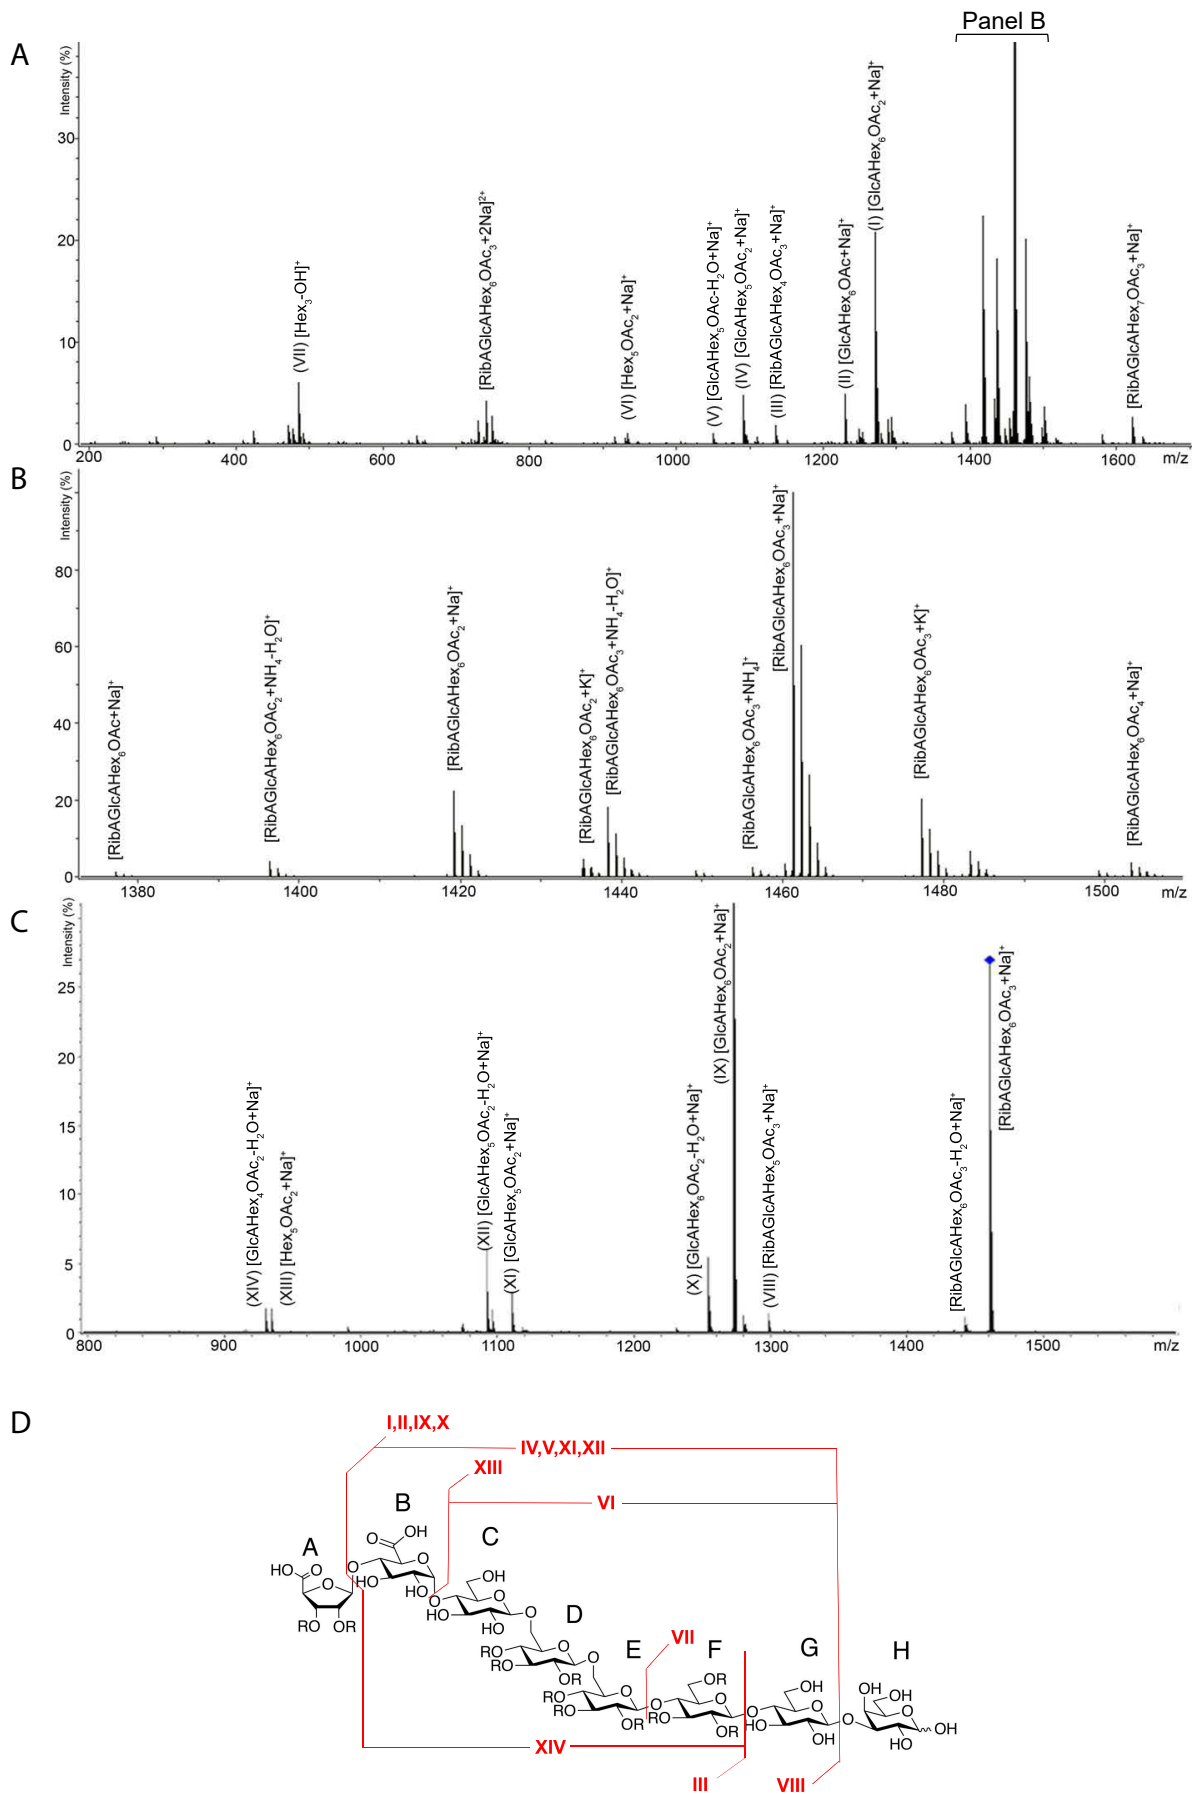

Supplemental Figure 5

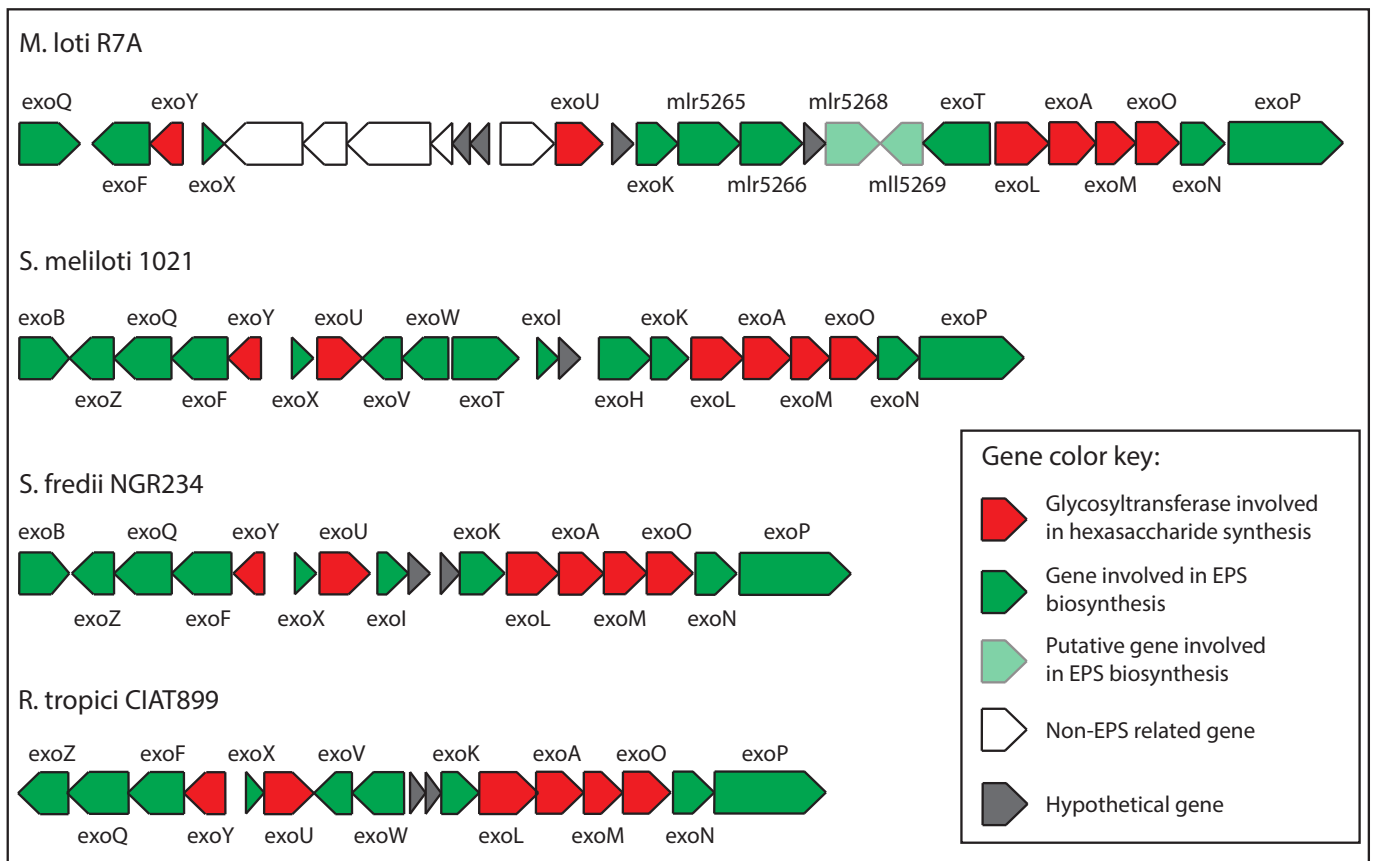

Supplemental Figure 6
